# Supplementary material
Source: PubMed Central journal article supplement (PMC3232316)
Supplement: NIHMS333322-supplement-Sup_Mat.pdf [file NIHMS333322-supplement-Sup_Mat.pdf]

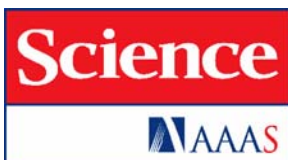

## Supporting Online Material for

### **Increasing the Potency and Breadth of an HIV Antibody by Using Structure-Based Rational Design**

Ron Diskin, Johannes F. Scheid, Paola M. Marcovecchio, Anthony P. West, Jr., Florian Klein, Han Gao, Priyanthi N. P. Gnanapragasam, Alexander Abadir, Michael S. Seaman, Michel C. Nussenzweig, Pamela J. Bjorkman\*

\*To whom correspondence should be addressed. E-mail: [bjorkman@caltech.edu](mailto:bjorkman@caltech.edu)

Published 27 October 2011 on *Science* Express  
DOI: 10.1126/science.1213782

#### **This PDF file includes:**

Materials and Methods  
SOM Text  
Figs. S1 to S8  
Tables S1 to S9  
References

## Supporting Online Material for

### Increasing the Potency and Breadth of an HIV Antibody using Structure-Based Rational Design

Ron Diskin<sup>1</sup>, Johannes F. Scheid<sup>2,3</sup>, Paola M. Marcovecchio<sup>1</sup>, Anthony P. West, Jr.<sup>1</sup>, Florian Klein<sup>2</sup>, Han Gao<sup>1</sup>, Priyanthi N. P. Gnanapragasam<sup>1</sup>, Alexander Abadir<sup>2</sup>, Michael S. Seaman<sup>4</sup>,  
Michel C. Nussenzweig<sup>2,5</sup> and Pamela J. Bjorkman<sup>1,6</sup>

<sup>1</sup>Division of Biology and <sup>6</sup>Howard Hughes Medical Institute, California Institute of Technology,  
1200 E. California Blvd., Pasadena, CA 91125

<sup>2</sup>Laboratory of Molecular Immunology and <sup>5</sup>Howard Hughes Medical Institute, The Rockefeller  
University, New York, NY 10065

<sup>3</sup>Charite Universitätsmedizin, D-10117 Berlin, Germany

<sup>4</sup>Beth Israel Deaconess Med. Ctr., Boston, MA 02215; United States

This PDF file includes

Materials and Methods

Supplementary Discussion

Figs. S1 to S8

Tables S1 to S9

References

## MATERIALS AND METHODS

### Protein expression and purification

Proteins were produced and purified using previously-described methods (34). Briefly, NIH45-46 IgG was expressed by transient transfection in HEK293-6E cells. Secreted IgG was purified from cell supernatants using protein A affinity chromatography (GE Healthcare). Fab fragments were prepared by digesting purified IgG with immobilized papain (Pierce) at 10 mg/mL and then separating Fabs from Fc-containing proteins using protein A chromatography and Superdex 200 16/60 size exclusion chromatography. For crystallization trials, the NIH45-46 Fab for crystallization experiments was concentrated to 11 mg/mL in 20 mM Tris pH 8.0, 150 mM sodium chloride, 0.02% sodium azide (TBS). Substitutions in heavy chain residue 54 of NIH45-46, 3BNC55, 12A12, 3BNC117 and 3BNC60 were introduced using a Quikchange II kit (Agilent technologies). Wild type, mutant forms and chain swapped versions of these proteins were expressed as IgGs in HEK293-6E cells and purified by protein A chromatography as described for NIH45-46 IgG. Proteins were stored at a concentration of 1 mg/mL for neutralization assays in either 10 mM sodium citrate pH 3.05, 50 mM sodium chloride, 0.02% sodium azide or in TBS (12A12 and 12A12<sup>Y54W</sup>) or in phosphate buffered saline (NIH45-46 mutated/truncated in CDRH3 and NIH45-46/VRC01 heavy and light chain swapped antibodies (Abs)) prior to dilution into neutral pH cell media. For SPR analyses, NIH45-46 and NIH45-46<sup>G54W</sup> heavy chains were subcloned into the pTT5 (NRC-BRI) expression vector to encode C-terminal 6x-His tagged Fab heavy chains (V<sub>H</sub>-C<sub>H</sub>1-6x-His tag), and the heavy chain expression vectors were co-transfected with the appropriate light chain vector into HEK293-6E cells. Supernatants were collected after 7 days, buffer exchanged into TBS and loaded on a Ni<sup>2+</sup>-NTA affinity column (Qiagen). Fabs were eluted using TBS supplemented with 250 mM imidazole and further purified by Superdex 200 10/300 size exclusion chromatography (GE Healthcare) in TBS.

Genes encoding truncated 93TH053, CAP244.2.00.D3, and Q259.d2.17 gp120 cores including the deletions and modifications described in ref. (25) were chemically synthesized (BlueHeron). An extra disulfide bond was introduced into 93TH053 by changing the Val65 and Ser115 codons into cysteines. The modified core genes were subcloned into the pACgp67b expression vector (BD Biosynthesis) to include a C-terminal 6x-His tag, expressed in baculovirus-infected insect cells, and purified from insect cell supernatants as previously described (34). For crystallization experiments, purified NIH45-46 Fab and 93TH057 gp120 were incubated at a 1:1 molar ratio and treated with 40 kU of Endoglycosidase H (New England Biolabs) for 16 hours at 37° C. The complex was purified after the incubation by Superdex 200 10/300 size exclusion chromatography (GE Healthcare) and then concentrated to OD<sub>280</sub> = 9.6 in 20 mM Tris pH 8.0, 300 mM sodium chloride, 0.02% sodium azide.

### Crystallization

Crystallization screening was done by vapor diffusion in sitting drops by a Mosquito® crystallization robot (TTP labs) using 400 nL drops (1:1 protein to reservoir ratio) utilizing commercially available crystallization screens (Hampton). Initial crystallization hits for Fab NIH45-46 and for NIH45-46–93TH057 complex were identified using the PEGRx HT™ (Hampton) screen and then manually optimized. Thin needle-like crystals of Fab NIH45-46 (space group P2<sub>1</sub>2<sub>1</sub>,  $a = 49.4 \text{ \AA}$ ,  $b = 87.4 \text{ \AA}$ ,  $c = 166.4 \text{ \AA}$ ; one molecule per asymmetric unit) were obtained upon mixing a

protein solution at 11 mg/mL with 12% polyethylene glycol 20,000, 0.1 M sodium acetate pH 5.0, 0.1 M sodium/potassium tartrate, 0.02 M ammonium sulfate at 20 °C. Crystals were briefly soaked in mother liquor solution supplemented with 15% and then 30% glycerol before flash cooling in liquid nitrogen. Crystals of the NIH45-46–93TH057 complex (space group  $P2_12_12_1$ ,  $a = 69.1$  Å,  $b = 70.5$  Å,  $c = 217.7$  Å; one molecule per asymmetric unit) were obtained upon mixing a protein solution at  $OD_{280}=9.6$  with 12% isopropanol, 10% polyethylene glycol 10,000, 0.1 M sodium citrate pH 5.0 at 20 °C. Complex crystals were cryo-cooled by covering the crystallization drops with paraffin oil to prevent evaporation and then adding an excess of 20% isopropanol, 5% glycerol, 10% polyethylene glycol, 0.1 M sodium citrate pH 5.0 to the drops prior to mounting and flash cooling the crystals in liquid nitrogen.

### Data collection, structure solution and refinement

X-ray diffraction data were collected at the Stanford Synchrotron Radiation Lightsource (SSRL) beamline 12-2 using a Pilatus 6M pixel detector (Dectris). The data were indexed, integrated and scaled using XDS (35). The Fab NIH45-46 structure was solved by molecular replacement using Phaser (36) and the  $V_HV_L$  and  $C_H1C_L$  domains of the VRC01 Fab (PDB code 3NGB) as separate search models. The model was refined to 2.6 Å resolution using an iterative approach involving refinement using the Phenix crystallography package (37) and manually fitting models into electron density maps using Coot (38). The final model ( $R_{work} = 18.4\%$ ;  $R_{free} = 23.8\%$ ) includes 3380 protein atoms, 125 water molecules and 37 ligand atoms, including N-Acetylglucosamine, glycerol and a sulfate ion (Table S1). 96.5%, 3.3% and 0.2% of the residues were in the favored, allowed and disallowed regions, respectively, of the Ramachandran plot. The first glutamine of the NIH45-46 heavy chain was modeled as 5-pyrrolidone-2-carboxylic acid.

A search model for solving the NIH45-46–93TH057 complex was created by superimposing the refined structure of the NIH45-46 Fab on the VRC01 Fab in the structure of VRC01–93TH057 (PDB code 3NGB). A molecular replacement solution was found as described above using separate search models for the  $V_HV_L$  domains of NIH45-46 complexed with 93TH057 and the  $C_H1C_L$  domains of NIH45-46. (Table S1). The complex structure was refined to 2.45 Å resolution as described for the Fab structure. To reduce model bias, the CDRH3 of NIH45-46 was omitted from the model and then built into electron density maps after a few rounds of refinement. Formation of an introduced disulfide bond between residues 65 and 115 in 93TH057 gp120 was verified in a  $F_o - F_c$  annealed omit electron density map contoured at  $3.0 \sigma$ . The final model ( $R_{work} = 20.7\%$ ;  $R_{free} = 25.6\%$ ) includes 5989 protein atoms, 67 water molecules and 148 atoms of carbohydrates, citrate and chloride ions (Table S1). 96.1%, 3.5% and 0.4% of the residues were in the favored, allowed and disallowed regions, respectively, of the Ramachandran plot. Disordered residues that were not included in the model were residues 1-2 of the NIH45-46 light chain, residues 133-136 and 219-221 of the heavy chain, and residues 302-308 (V3 substitution), residues 397-408 (a total of 6 residues from V4) and the 6x-His tag of 93TH057. The first glutamine of the NIH45-46 heavy chain was modeled as 5-pyrrolidone-2-carboxylic acid.

Buried surface areas were calculated using AreaIMol in CCP4 (39) and a 1.4 Å probe. Superimposition calculations were done and molecular representations were generated using PyMol (40).

## Surface Plasmon Resonance (SPR) measurements

The binding of gp120 core proteins to wild-type NIH45-46 Fab and to mutant (NIH45-46<sup>G54W</sup>) Fab was compared using a Biacore T100 instrument (GE Healthcare). Purified NIH45-46 and NIH45-46<sup>G54W</sup> Fabs were immobilized at coupling densities of 500 resonance units (RU) or 1500 RU on a CM5 sensor chip (Biacore) in 10 mM acetate pH 5.0 using primary amine coupling chemistry as described in the Biacore manual. One of the four flow cells on each sensor chip was mock-coupled using buffer to serve as a blank. Experiments were performed at 25°C in 20 mM HEPES, pH 7.0, 150 mM sodium chloride and 0.005% (v/v) surfactant P20, and the sensor chips were regenerated using 10 mM glycine, pH 2.5. gp120 core proteins were injected in a two-fold dilution series at concentrations ranging from 500 nM to 31.2 nM at a flow rate of 70  $\mu$ L/min. After subtracting the signal from the mock-coupled flow cell, kinetic data were globally fit to a 1:1 binding model (Biacore evaluation software) to derive on- and off-rate constants, which were used to calculate affinities as  $K_D = k_d/k_a$ .

## *In vitro* neutralization assays

A previously-described pseudovirus neutralization assay was used to compare the neutralization potencies of wild-type and mutant IgGs (41). Neutralization assays were performed either by the Collaboration for AIDS Vaccine Discovery (CAVD) core neutralization facility (Fig 4A, Tables S5, S6) or by our laboratory (Fig. S5C, S8, Tables S2, S8) using the same protocol (41). Briefly, pseudoviruses were generated in HEK293T cells by co-transfection of an Env-expressing vector and a replication-incompetent backbone plasmid. Neutralization was assessed by measuring the reduction in luciferase reporter gene expression in the presence of a potential inhibitor following a single round of pseudovirus infection in TZM-bl cells. Antibodies were pre-incubated with 250 infectious viral units in a three or four-fold dilution series for one hour at 37°C before adding 10,000 TZM-bl cells per well for a two-day incubation. Cells were then lysed and luciferase expression was measured using BrightGlo (Promega) and a Victor3 luminometer (PerkinElmer). Nonlinear regression analysis using the program Prism (GraphPad) was used to calculate the concentrations at which half-maximal inhibition was observed (IC<sub>50</sub> values) as described (42). Samples were initially screened in duplicates. Reagents that showed enhanced activity were tested again as triplicates. Values for NIH45-46 and NIH45-46<sup>G54W</sup> in Fig. S8A were obtained from three independent experiments. Similar IC<sub>50</sub> values were obtained in two independent neutralization experiments using different dilution series.

## SUPPLEMENTARY DISCUSSION

### Comparison of Tyr74 in NIH45-46 and VRC01

The conformation of heavy chain residue Tyr74, a FWR3 residue that was substituted during somatic hypermutation (16), differs in the NIH45-46 and VRC01 structures. In NIH45-46–93TH057, the hydroxyl of Tyr74<sub>NIH45-46</sub> hydrogen bonds with the carbonyl oxygen of Leu122<sub>gp120</sub> in the bridging sheet (Fig. S4B). The Tyr74<sub>NIH45-46</sub> sidechain adopts a similar orientation in the structure of unbound NIH45-46 despite a slight mainchain displacement (Fig. 1A). By contrast, in VRC01–93TH057, the Tyr74<sub>VRC01</sub> sidechain is stabilized by Gly8<sub>VRC01</sub> of a crystallographic neighbor; rather than hydrogen bonding with Leu122<sub>gp120</sub>, it approaches Gly124<sub>gp120</sub> (part of a recombinant insert replacing V1-V2) (PDB code: 3NGB). As Tyr74<sub>VRC01</sub> probably occupies space filled by the V1-V2 stem, the conformation of Tyr74 observed in NIH45-46–93TH057 is likely favored when interacting with spike trimers on a virion, implying that VRC01, like NIH45-46, targets the bridging sheet as part of its binding surface on gp120. However, the Leu122<sub>gp120</sub> region of the bridging sheet was eliminated from the resurfaced RSC3 gp120 due to a truncation beginning at residue 121 (8) (Fig. S6).

### Comparison of NIH45-46 and VRC01 light chains

Contacts between the antibody light chain and gp120 are mostly conserved between the NIH45-46–93TH057 and VRC01–93TH057 structures with a notable exception: Ser28<sub>NIH45-46 LC</sub> in CDRL1 replaces a solvent-exposed tyrosine (Tyr28<sub>VRC01 LC</sub>) that interacts with ordered N-linked carbohydrate attached to Asn276<sub>93TH057</sub>. By contrast, the Ser28<sub>NIH45-46 LC</sub> sidechain does not contact gp120 carbohydrates; instead it faces away from gp120, hydrogen bonding with Arg64<sub>NIH45-46 LC</sub> (FWR3) and creating a 2.7 Å displacement of the mainchain C $\alpha$  atoms (Fig. S5A). The Ser28<sub>NIH45-46 LC</sub>–Arg64<sub>NIH45-46 LC</sub> interaction is maintained in unbound NIH45-46 (Fig. S5B). The position 28 substitution of serine for tyrosine largely accounts for the burial of more surface area in gp120's interaction with the VRC01 versus NIH45-46 light chain (681 Å<sup>2</sup> versus 395 Å<sup>2</sup> total buried surface area; 314 Å<sup>2</sup> versus 203 Å<sup>2</sup> buried surface area on the light chain) (Table S4). The larger contact area for the VRC01 light chain may account for the ability of VRC01, but not NIH45-46, to neutralize the clade C CAP45.2.00.G3 strain, given that the NIH45-46 heavy chain paired with the VRC01 light chain neutralizes this strain, whereas the VRC01 heavy chain paired with the NIH45-46 light chain does not (Table S10). However, the VRC01 light chain did not increase the potency of NIH45-46 against three other viral strains (Fig. S5C), suggesting that the Tyr28 interaction with gp120 carbohydrate is not obligatory.

# Figure S1

## Sequence alignment of V<sub>H</sub>

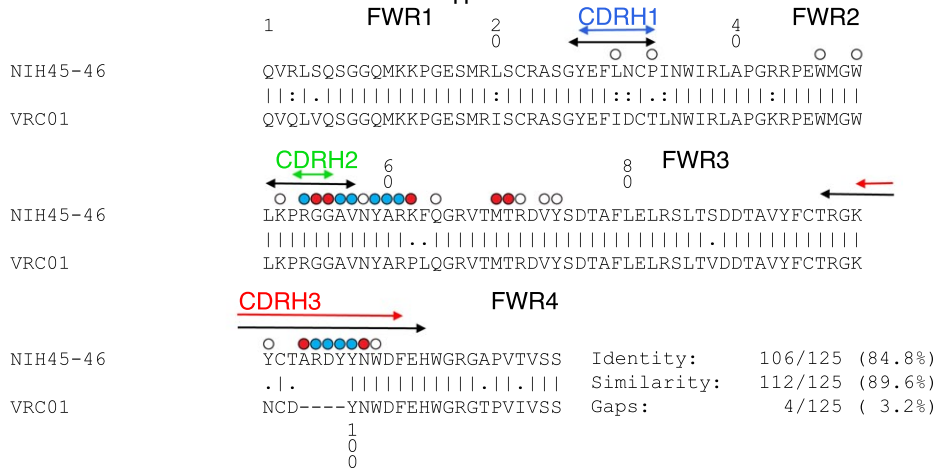

## Sequence alignment of V<sub>L</sub>

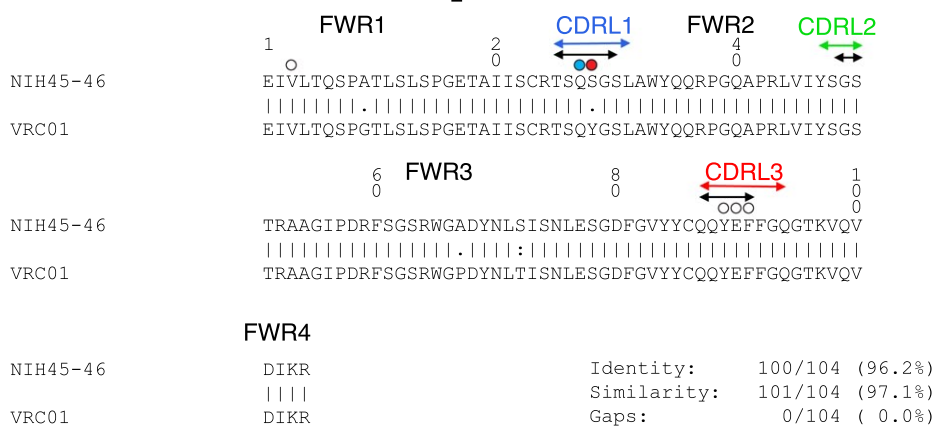

**Fig. S1.** Sequence alignment of NIH45-46 and VRC01 (residue are numbered as defined for VRC01 (8)). Circles mark NIH45-46 residues that contact gp120; unfilled circles indicate side chain contacts, red circles indicate main chain contacts, and blue circles indicate contacts with both the side and the main chain. Black arrows indicate the boundaries of complementarity determining regions (CDRs) as defined by IMGT (43), and residues within CDR loops as defined by the structure are marked with colors corresponding to the CDR colors in Fig. 1B. The locations of framework regions (FWRs) are indicated before, after, and between the CDRs. The definition of CDR2 in ref. (8) was the same as that defined by IMGT; however CDR2 was defined differently in refs. (25, 26) to include C-terminal residues within the C' β-strand and FWR3.

**Figure S2**

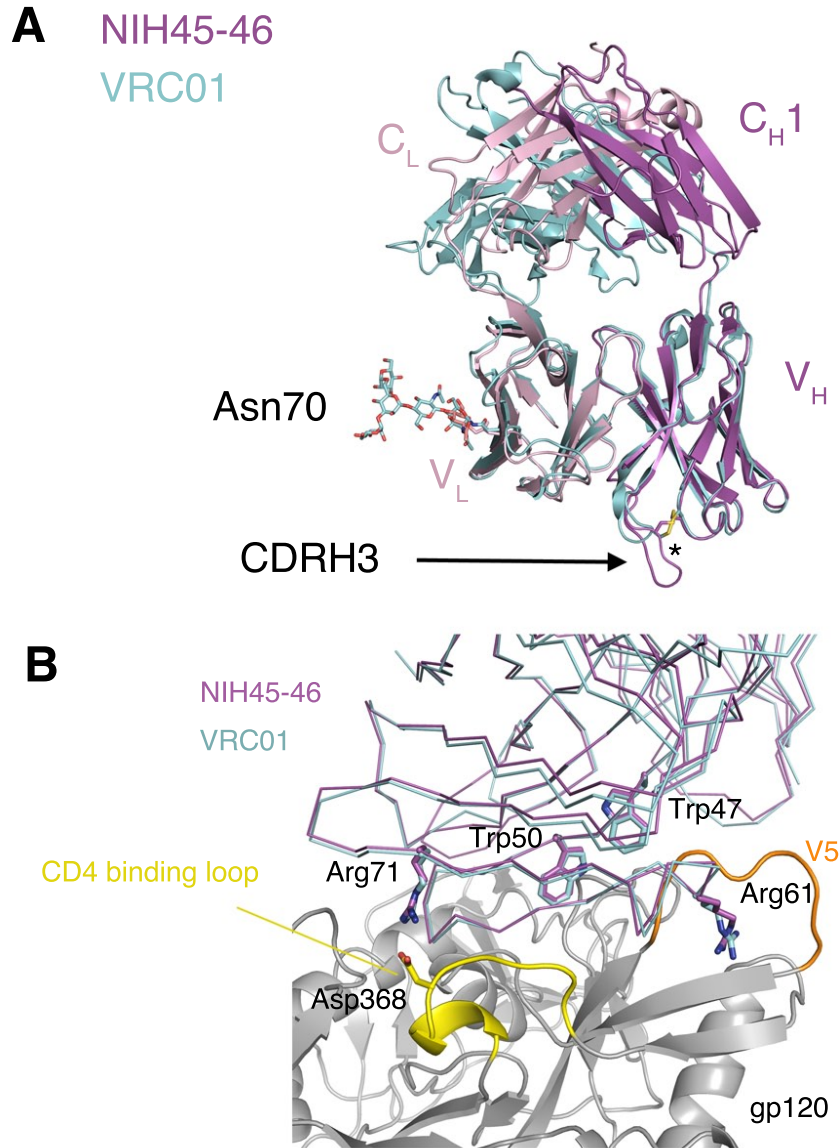

**Fig. S2.** Comparisons of NIH45-46 and VRC01 from the gp120-bound structures. **(A)** NIH45-46 is shown in magenta (heavy chain) and pink (light chain) and VRC01 is cyan. The additional disulfide bond joining CDRH2 and CDRH3 is indicated by an asterisk and carbohydrate attached to Asn70 is shown as sticks. An arrow points to CDRH3, which includes a four-residue insertion in NIH45-46. **(B)** Conserved interactions in the gp120 contacts of NIH45-46 and VRC01. The antigen-binding regions of the NIH45-46 (magenta) and VRC01 (cyan) Fabs are shown complexed with 93TH053 gp120 (gray with yellow CD4-binding loop and orange V5 loop). Contact residues that are conserved in both structures as sticks.



**Figure S3**

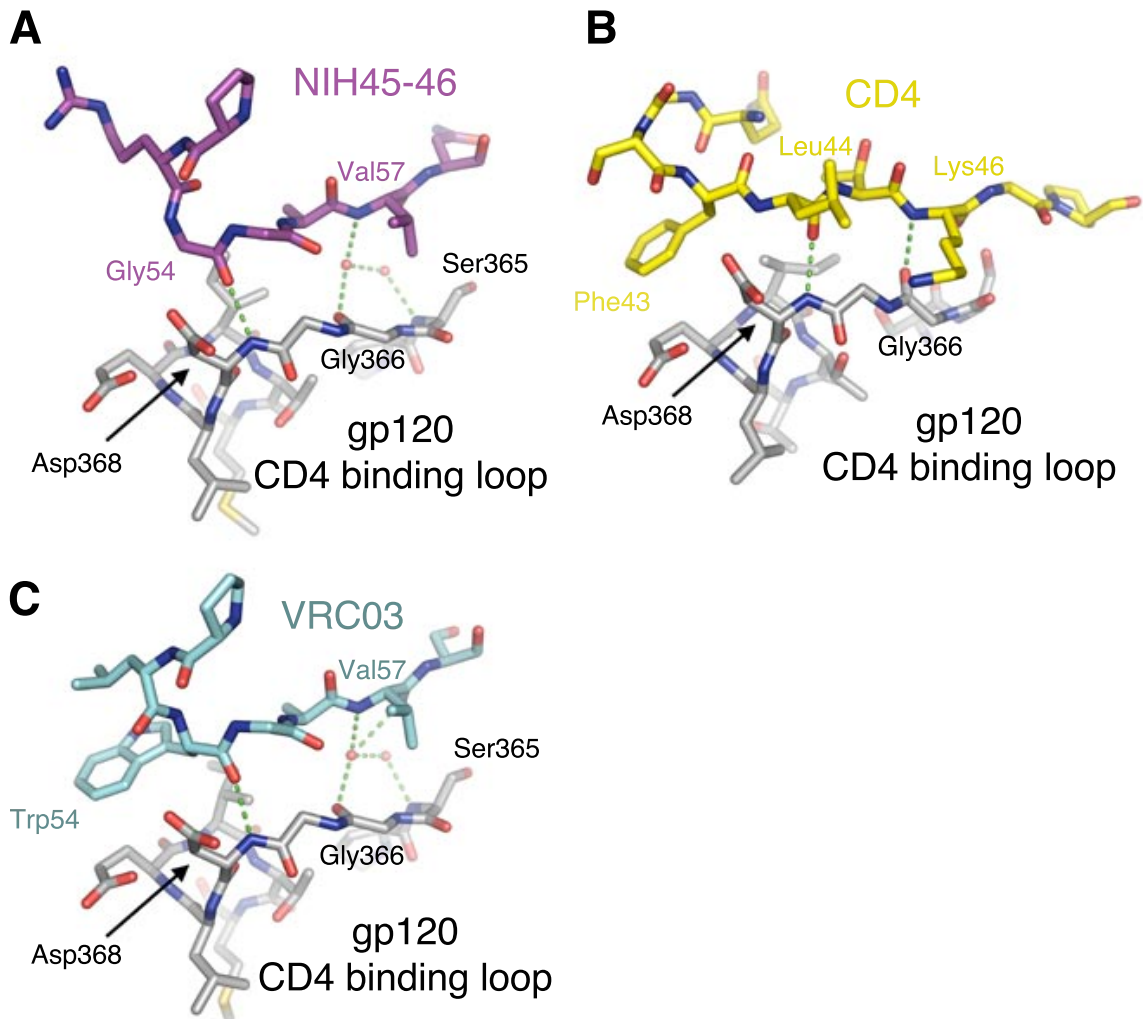

**Fig. S3.** Hydrogen bonding within the gp120 CD4-binding loop. **(A)** A direct hydrogen bond (green dotted line) forms between main chain atoms of Gly54<sub>NIH45-46</sub> (magenta) and Asp368<sub>gp120</sub> (gray), and two water molecules (red spheres) mediate a hydrogen bond network between NIH45-46 and the CD4-binding loop. **(B)** CD4 (yellow) forms two direct hydrogen bonds with the CD4-binding loop (31). **(C)** The carbonyl oxygen of Trp54<sub>VRC03</sub> (cyan) forms a direct hydrogen bond with Asp368<sub>gp120</sub> (PDB code: 3SE8) using a similar architecture as shown for NIH45-46 in panel A, demonstrating that a tryptophan can be accommodated at position 54 without disrupting the hydrogen bond to Asp368<sub>gp120</sub>.

**Figure S4**

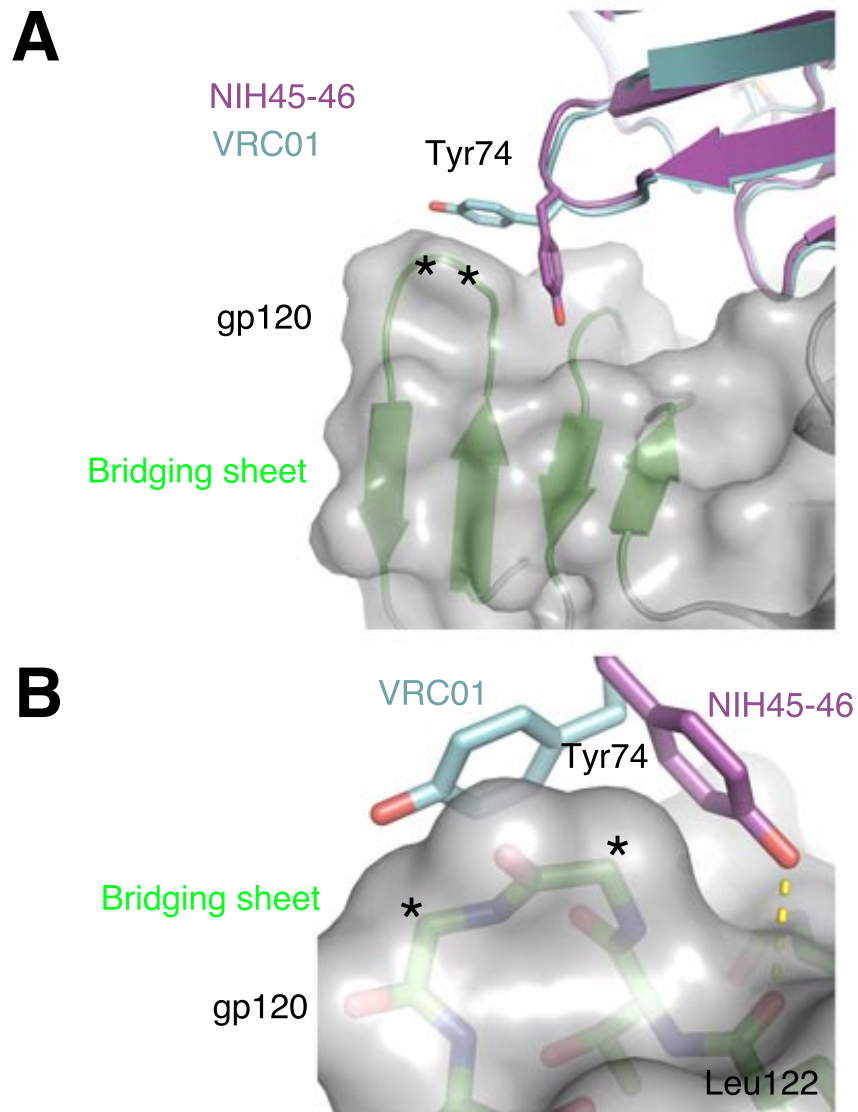

**Fig. S4.** Conformation of Tyr74<sub>NIH45-46</sub> (see Supplementary Discussion). **(A)** Superimposition of NIH45-46 (magenta) and VRC01 (cyan) in the bound states shows different conformations of heavy chain residue Tyr74. The gp120 bridging sheet is green and asterisks indicate the recombinant Gly<sub>2</sub> linker that replaces the V1-V2 loop. **(B)** Close-up showing the hydrogen bond between Tyr74<sub>NIH45-46</sub> and the main chain carbonyl oxygen of Leu122<sub>gp120</sub>.

**Figure S5**

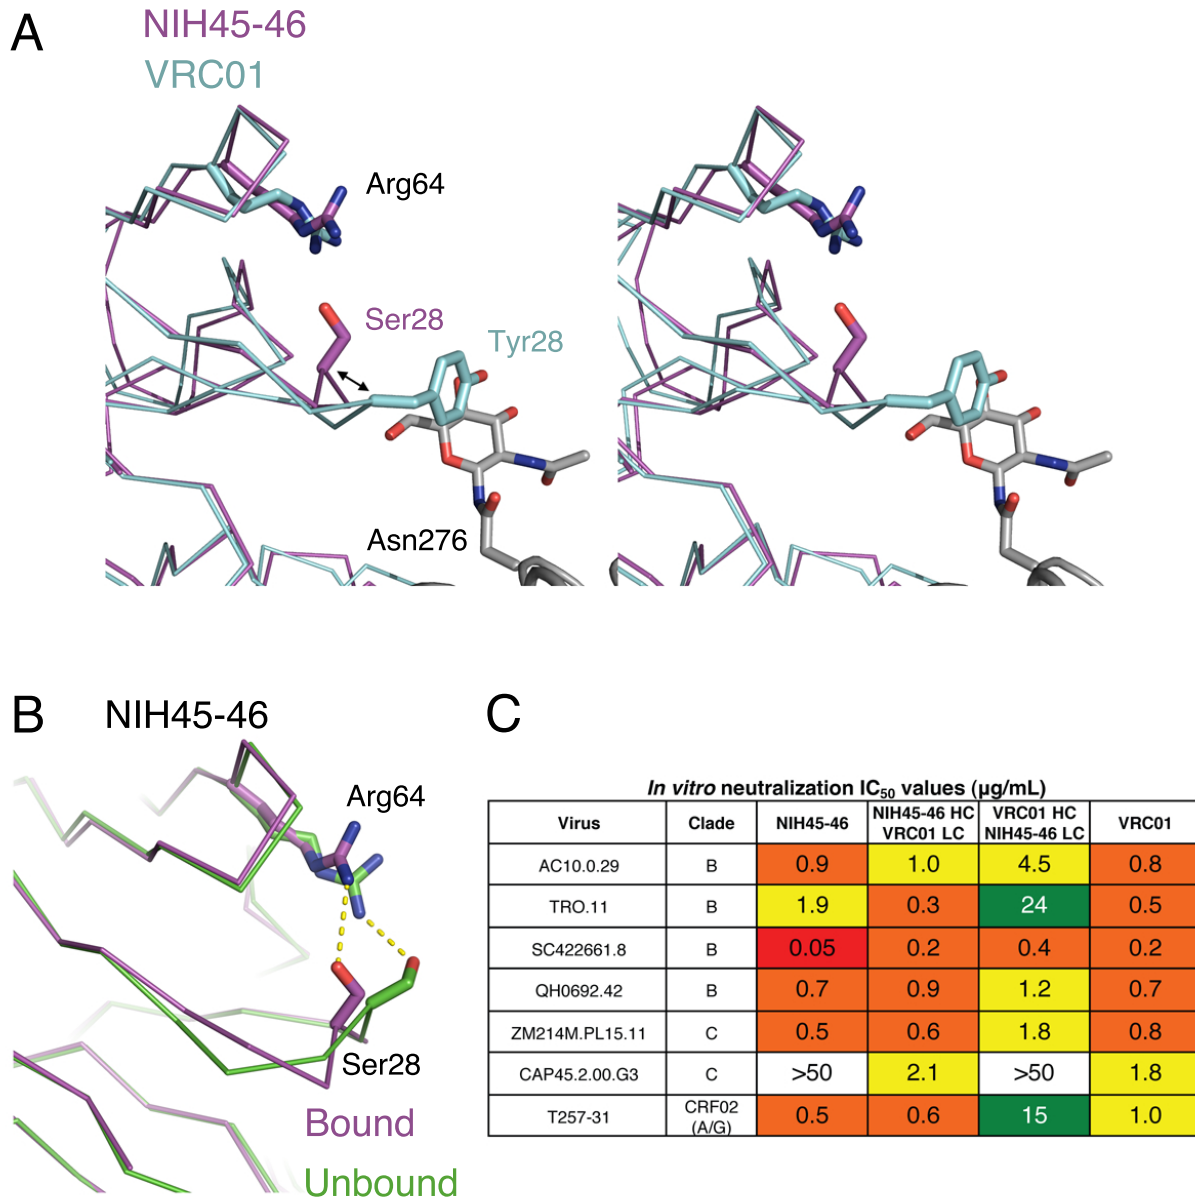

**Fig. S5.** The NIH45-46 light chain (see Supplementary Discussion). **(A)** Stereo view of the superimposition of NIH45-46 and VRC01 light chains (magenta and cyan, respectively). Tyr28<sub>VRC01 LC</sub> interacts with N-linked carbohydrate attached to Asn276<sub>gp120</sub>. By contrast, the side chain of the counterpart residue in NIH45-46, Ser28<sub>NIH45-46 LC</sub>, faces away from gp120 to hydrogen bond with Arg64<sub>NIH45-46 LC</sub>, which results in a 2.7 Å local displacement of the NIH45-46 main chain relative to VRC01 (arrowheads point to Ca atoms of residue 28 in each structure). **(B)** Superimposition of NIH45-46<sub>light chain</sub> in the bound and unbound structures (magenta and green, respectively) showing hydrogen bonds between Ser28 and Arg64. **(C)** Comparisons of neutralization by wild-type versus light chain-swapped antibodies. Color-coded according to IC<sub>50</sub> values (μg/mL): red <0.1, orange 0.1-1, yellow 1-10, green 10-50, white > 50 (not neutralizing).

**Figure S6**

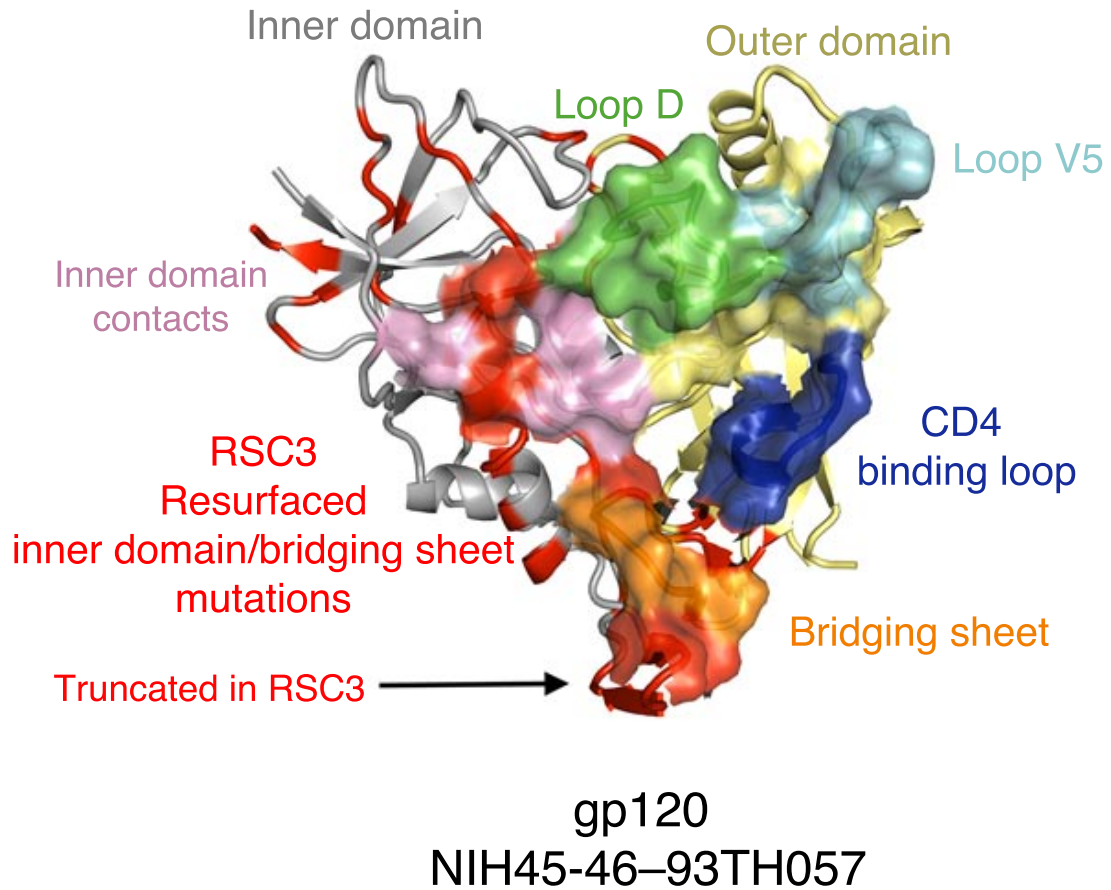

**Fig. S6.** NIH45-46 contact surfaces that were mutated in RSC3. 93TH057 gp120 is shown using a ribbon diagram and color coded as in Fig. 1B. Residues at each contact interface are highlighted on the gp120 structure as a surface enclosing the contact residues. The surface area on the inner domain that is buried by contact with NIH45-46 is shown in pink with inner domain/bridging sheet residues that were mutated in RSC3 (8) in red.

**Figure S7**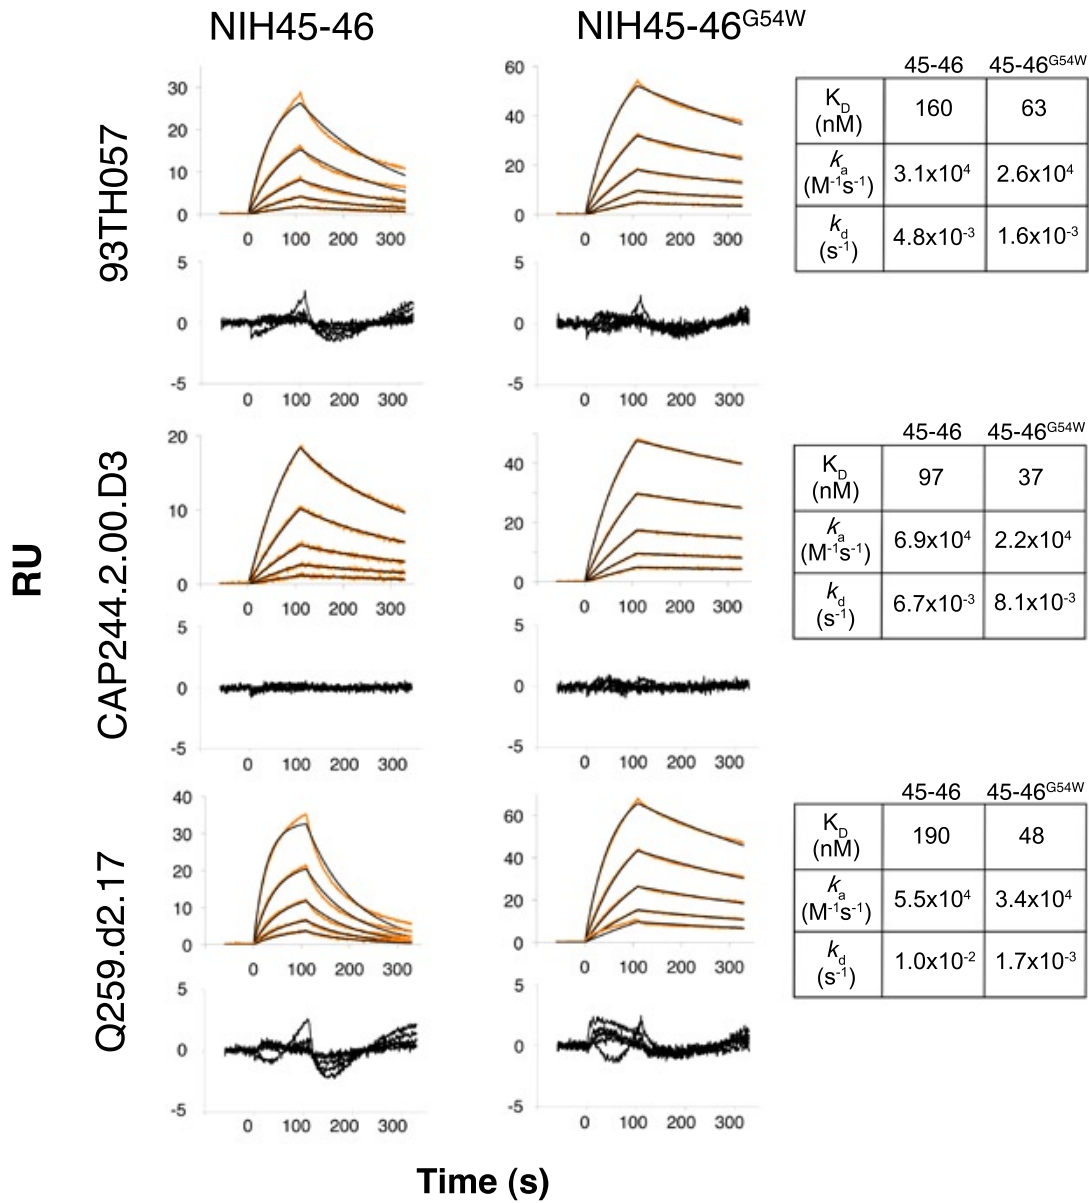

**Fig. S7.** Sensorgrams from SPR experiments comparing the binding of the indicated gp120 core proteins to NIH45-46 or NIH45-46<sup>G54W</sup> Fabs. The gp120 proteins were injected as a concentration series (500 nM to 31.2 nM; two-fold dilutions) over Fabs that were immobilized at a surface density of 1500 RU. (Similar results were obtained in independent experiments in which the IgGs were immobilized at 500 RU; data not shown). Best-fit binding curves (black lines) for a 1:1 binding model are superimposed on the raw data (orange). Corresponding residual plots are shown below each sensorgram.

**Figure S8**

**A**

| Virus          | Clade | NIH45-46 IC <sub>50</sub> (μg/mL) |      |      |      |      |      |      |      |
|----------------|-------|-----------------------------------|------|------|------|------|------|------|------|
|                |       | WT                                | G54W | G54F | G54Y | G54I | G54M | G54L | G54H |
| SC422661.8     | B     | 0.06                              | 0.03 | 0.02 | 0.06 | 0.1  | 0.06 | 0.1  | 0.09 |
| AC10.0.29      | B     | 0.9                               | 0.2  | 0.3  | 0.4  | 8.6  | 1.5  | 1.7  | 0.6  |
| TRO.11         | B     | 1.0                               | 0.09 | 0.08 | 0.1  | 10   | 0.3  | 0.3  | 0.2  |
| Du172.17       | C     | >50                               | 0.9  | 16   | >50  | >50  | >50  | >50  | >50  |
| CAP210.2.00.E8 | C     | >50                               | 41   | >50  | >50  | >50  | >50  | >50  | >50  |
| CAP45.2.00.G3  | C     | >50                               | 6.6  | >50  | 45   | >50  | >50  | >50  | >50  |

**B**

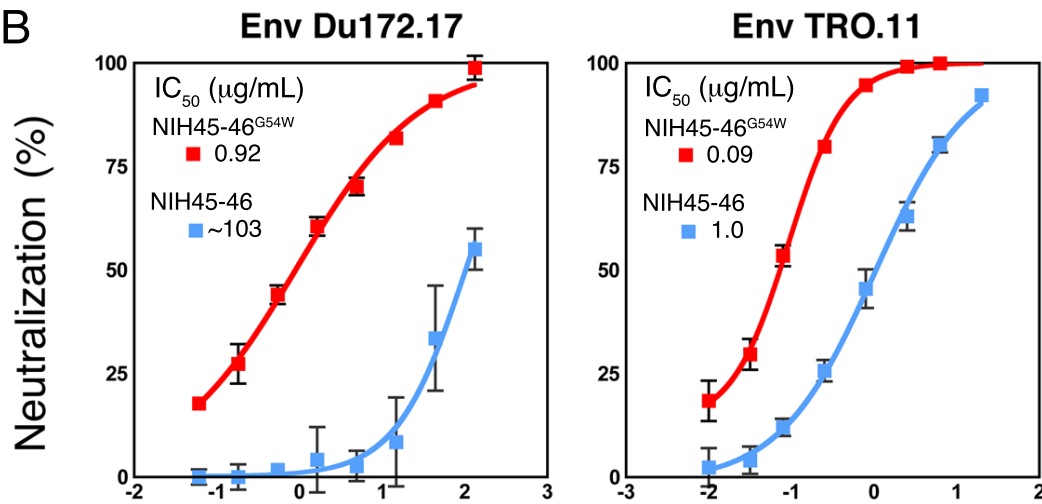

**Fig. S8.** Increased neutralization potency of NIH45-46<sup>G54W</sup>. **(A)** *In vitro* neutralization data for a panel of six viruses chosen to include NIH45-46-sensitive and resistant strains color-coded according to IC<sub>50</sub> values (μg/ml): red <0.1, orange 0.1-1, yellow 1-10, green 10-50, white >50 (not neutralizing). **(B)** Representative neutralization curves showing the activity of NIH45-46<sup>G54W</sup> (red) and NIH45-46 (cyan). The experimental points are averaged values from three independent assays. Error bars indicate standard deviations. The IC<sub>50</sub> value for NIH45-46 against strain DU172.17 was extrapolated from data that do not reach saturation in assays conducted with high concentrations to detect weak neutralizing activity.

**Table S1****Data collection and refinement statistics**

|                                                     | NIH45-46-93TH057                              | Fab NIH45-46                                  |
|-----------------------------------------------------|-----------------------------------------------|-----------------------------------------------|
| <b>Data collection</b>                              |                                               |                                               |
| Wavelength (Å)                                      | 0.953                                         | 0.953                                         |
| Space group                                         | P2 <sub>1</sub> 2 <sub>1</sub> 2 <sub>1</sub> | P2 <sub>1</sub> 2 <sub>1</sub> 2 <sub>1</sub> |
| Cell dimensions                                     |                                               |                                               |
| <i>a</i> , <i>b</i> , <i>c</i> (Å)                  | 69.1, 70.5, 217.7                             | 49.4, 87.4, 166.4                             |
| $\alpha$ , $\beta$ , $\gamma$ (°)                   | 90.0, 90.0, 90.0                              | 90.0, 90.0, 90.0                              |
| Resolution (Å)                                      | 37.05-2.45 (2.51-2.45)                        | 38.68-2.60 (2.67-2.60)                        |
| <i>R</i> <sub>meas</sub> (%)                        | 7.5 (66.9)                                    | 12.2 (105.6)                                  |
| <i>R</i> <sub>mgd-F</sub> (%)                       | 11.6 (108.1)                                  | 13.1 (78.0)                                   |
| <i>I</i> / $\sigma$ <i>I</i>                        | 10.8 (1.8)                                    | 12.83 (2.0)                                   |
| Completeness (%)                                    | 98.6 (98.7)                                   | 99.5 (99.9)                                   |
| Multiplicity                                        | 3.7                                           | 6.6                                           |
| Reflections                                         | 145342                                        | 150105                                        |
| Unique reflections                                  | 39062                                         | 22795                                         |
| <b>Refinement</b>                                   |                                               |                                               |
| Resolution (Å)                                      | 37.05-2.45                                    | 38.68-2.6                                     |
| No. reflections                                     | 38987                                         | 22692                                         |
| <i>R</i> <sub>work</sub> / <i>R</i> <sub>free</sub> | 20.7 / 25.6                                   | 18.4 / 23.8                                   |
| No. atoms                                           |                                               |                                               |
| Protein                                             | 5989                                          | 3380                                          |
| Ligand/ion                                          | 148                                           | 37                                            |
| Water                                               | 67                                            | 125                                           |
| <i>B</i> -factors                                   |                                               |                                               |
| Protein                                             | 79.9                                          | 46.0                                          |
| Ligand/ion                                          | 106.4                                         | 80.9                                          |
| Water                                               | 62                                            | 42.0                                          |
| <b>Ramachandran</b>                                 |                                               |                                               |
| Favored (%)                                         | 96.12                                         | 96.49                                         |
| Allowed (%)                                         | 3.48                                          | 3.28                                          |
| Outlier (%)                                         | 0.40                                          | 0.23                                          |
| R.m.s. deviations                                   |                                               |                                               |
| Bond lengths (Å)                                    | 0.004                                         | 0.004                                         |
| Bond angles (°)                                     | 0.754                                         | 0.838                                         |

5% of unique reflections were removed as a test set for the *R*<sub>free</sub> calculation.

Values in parentheses are for the highest resolution shell.

**Table S2****Effects of the insertion in NIH45-46 on neutralization potency*****In vitro* neutralization IC<sub>50</sub> values (µg/mL)**

| Virus          | Clade       | NIH45-46 WT | NIH45-46 Y99dA | NIH45-46 Δ99a-99d |
|----------------|-------------|-------------|----------------|-------------------|
| AC10.0.29      | B           | 0.9         | 4.4            | 13                |
| TRO.11         | B           | 1.9         | >50            | >50               |
| SC422661.8     | B           | 0.05        | 0.08           | 1.4               |
| QH0692.42      | B           | 0.7         | 2.1            | 3.7               |
| ZM214M.PL15.11 | C           | 0.3         | 1.1            | 2.2               |
| CAP45.2.00.G3  | C           | >50         | >50            | >50               |
| T257-31        | CRF02 (A/G) | 0.5         | 2.4            | 7.0               |

|                          | CDRH3 sequence             |
|--------------------------|----------------------------|
| <b>NIH45-46 WT</b>       | FCTRGKYCTARDYYNWDFEHWGRGAP |
| <b>NIH45-46 Y99dA</b>    | FCTRGKYCTARDAYNWDFEHWGRGAP |
| <b>NIH45-46 Δ99a-99d</b> | FCTRGKYCT----YNWDFEHWGRGAP |

Color-coded according to IC<sub>50</sub> values (µg/mL): red <0.1, orange 0.1-1, yellow 1-10, green 10-50, white > 50 (not neutralizing). IC<sub>50</sub> values for VRC01 tested against the same viral strains are shown in Fig. S5C.



**Table S3****Comparison of *in vitro* neutralization data for viral strains with differences at residue 281**

| Strain       | Sequence                                                                                                                                                                                                                                                                                                                                          | Residue 281 <sub>gp120</sub> | IC <sub>50</sub> *<br>μg/mL |
|--------------|---------------------------------------------------------------------------------------------------------------------------------------------------------------------------------------------------------------------------------------------------------------------------------------------------------------------------------------------------|------------------------------|-----------------------------|
| Du156.12     | QLLNGSLAE <del>E</del> E <del>E</del> E <del>E</del> I <del>I</del> I <del>I</del> KSEN <del>L</del> T <del>D</del> N <del>I</del> K <del>T</del> I <del>I</del> V <del>Q</del> L <del>N</del> Q <del>S</del> I <del>G</del> I <del>N</del> C <del>T</del> R <del>P</del> N <del>N</del> N <del>T</del> R <del>K</del> S <del>V</del>             | I                            | 0.01                        |
| ZM197M.PB7   | QLLNGSLAE <del>E</del> E <del>E</del> E <del>E</del> I <del>I</del> I <del>I</del> RSEN <del>L</del> T <del>D</del> N <del>T</del> K <del>T</del> I <del>I</del> V <del>H</del> L <del>N</del> E <del>S</del> V <del>E</del> I <del>E</del> C <del>V</del> R <del>P</del> N <del>N</del> N <del>T</del> R <del>K</del> S <del>V</del>             | T                            | 0.14                        |
| ZM214M.PL15  | QLLNGSLAE <del>E</del> E <del>E</del> E <del>E</del> I <del>I</del> I <del>I</del> RSEN <del>L</del> T <del>N</del> N <del>A</del> K <del>T</del> I <del>I</del> V <del>Q</del> L <del>T</del> E <del>A</del> V <del>N</del> I <del>T</del> C <del>M</del> R <del>P</del> G <del>N</del> N <del>T</del> R <del>R</del> S <del>V</del>             | A                            | 0.05                        |
| ZM249M.PL1   | QLLNGSLAE <del>E</del> E <del>E</del> E <del>E</del> I <del>I</del> I <del>I</del> RSEN <del>L</del> T <del>D</del> N <del>V</del> K <del>I</del> I <del>I</del> V <del>H</del> L <del>N</del> E <del>S</del> V <del>E</del> I <del>N</del> C <del>T</del> R <del>P</del> N <del>N</del> N <del>T</del> R <del>K</del> S <del>I</del>             | V                            | 0.02                        |
| ZM53M.PB12   | QLLNGSTAE <del>E</del> D <del>I</del> I <del>I</del> RSEN <del>L</del> T <del>N</del> N <del>A</del> K <del>T</del> I <del>I</del> V <del>H</del> L <del>N</del> E <del>S</del> I <del>E</del> I <del>E</del> C <del>T</del> R <del>P</del> G <del>N</del> N <del>T</del> R <del>K</del> S <del>I</del>                                           | A                            | 0.65                        |
| ZM109F.PB4   | QLLNGSLAE <del>E</del> E <del>E</del> E <del>E</del> I <del>V</del> I <del>R</del> S <del>E</del> N <del>L</del> T <del>D</del> N <del>A</del> K <del>T</del> I <del>I</del> V <del>H</del> L <del>N</del> K <del>S</del> V <del>E</del> I <del>E</del> C <del>I</del> R <del>P</del> G <del>N</del> N <del>T</del> R <del>K</del> S <del>I</del> | A                            | 0.22                        |
| ZM135M.PL10a | QLLNGSLSE <del>E</del> E <del>G</del> I <del>I</del> I <del>R</del> S <del>K</del> N <del>L</del> T <del>D</del> N <del>T</del> K <del>T</del> I <del>I</del> V <del>H</del> L <del>N</del> E <del>S</del> V <del>A</del> I <del>V</del> C <del>T</del> R <del>P</del> N <del>N</del> N <del>T</del> R <del>K</del> S <del>I</del>                | T                            | 0.36                        |

\* IC<sub>50</sub> values for NIH45-46 are taken from ref. (16).

**Table S4**  
**Buried Surface Area ( $\text{\AA}^2$ )**

|             | FWR1 | CDR1 | FWR2 | CDR2 | FWR3 | CDR3 | Total Fab | Interface on gp120 | CDR2 + FWR3 <sub>56-65</sub> * |
|-------------|------|------|------|------|------|------|-----------|--------------------|--------------------------------|
| NIH45-46 HC | 0    | 35   | 51   | 181  | 551  | 326  | 1144      | 1097               | 576                            |
| VRC01 HC    | 0    | 20   | 98   | 136  | 521  | 117  | 892       | 882                | 545                            |
| NIH45-46 LC | 35   | 8    | 0    | 0    | 0    | 159  | 203       | 192                | 0                              |
| VRC01 LC    | 36   | 114  | 0    | 0    | 0    | 165  | 314       | 367                | 0                              |

\*Box on the right with blue numbering: Residues that correspond to the CDR2 region as defined in ref. (25).

|          | Inner domain & bridging sheet | Loop D + NAG | $\beta$ -15/ $\alpha$ -3 + NAG | V5  | $\beta$ -24 | Outer domain exit loop | Total gp120 | Interface on Fab or CD4 |
|----------|-------------------------------|--------------|--------------------------------|-----|-------------|------------------------|-------------|-------------------------|
| NIH45-46 | 328                           | 335          | 222                            | 292 | 81          | 35                     | 1290        | 1346                    |
| VRC01    | 157                           | 433          | 208                            | 328 | 43          | 57                     | 1225        | 1206                    |
| CD4      | 400                           | 136          | 263                            | 155 | 14          | 97                     | 973         | 1059                    |

|        |
|--------|
| <10%   |
| 10-20% |
| 20-30% |
| 30-40% |
| 40-50% |
| >50%   |

**Table S4.** Buried surface areas were calculated using Areaimol in CCP4 (44). Color coding indicates the percent of the total buried surface area for each molecule. The insertion in CDRH3 contributes to a higher total buried surface area between the NIH45-46 heavy chain and gp120 compared with VRC01 (2241  $\text{\AA}^2$  versus 1774  $\text{\AA}^2$  total buried surface area; 1144  $\text{\AA}^2$  versus 892  $\text{\AA}^2$  buried surface area on the heavy chain). The difference in heavy chain buried area is largely due to more extensive gp120 contacts of the CDRH3<sub>NIH45-46</sub> loop: 326  $\text{\AA}^2$  of surface area of the NIH45-46 CDRH3 are buried by contacting gp120, compared with 117  $\text{\AA}^2$  for the VRC01 CDRH3. The extra contacts with gp120 created by the CDRH3 insertion allow the NIH45-46 footprint on gp120 to more closely resemble the CD4 footprint on gp120 than does the VRC01 footprint (Fig. 3C). In particular, CD4 makes at least 1/3 of its contacts with the inner domain and bridging sheet of gp120, as opposed to only 13% of the total surface area contacted by VRC01 involving non-outer domain elements of gp120 (25). The contact area with the inner domain and bridging sheet is increased to 25% in the NIH45-46 footprint on gp120.

**Table S5**

***In vitro* neutralization IC<sub>50</sub> values (µg/mL)**

| Virus          | Clade    | Category | NIH45-46 IC <sub>50</sub> (µg/mL) |        |       |       |
|----------------|----------|----------|-----------------------------------|--------|-------|-------|
|                |          |          | WT                                | G54W   | G54F  | G54Y  |
| 6545.v4.c1     | AC       | R        | >50                               | 18.92  | >50   | >50   |
| 6540.v4.c1     | AC       | R        | >50                               | >50    | >50   | >50   |
| CAP45.2.00.G3  | C        | R        | >50                               | 32.25  | >50   | >50   |
| Du422.1        | C        | R        | >50                               | >50    | >50   | >50   |
| CAP210.2.00.E8 | C        | R        | >50                               | >50    | >50   | >50   |
| 3817.v2.c59    | CD       | R        | >50                               | >50    | >50   | >50   |
| 89-F1_2_25     | CD       | R        | >50                               | >50    | >50   | >50   |
| 620345.c01     | CRF01_AE | R        | >50                               | >50    | >50   | >50   |
| T250-4         | CRF02_AG | R        | >50                               | 1.33   | >50   | >50   |
| T278-50        | CRF02_AG | R        | >50                               | >50    | >50   | >50   |
| 211-9          | CRF02_AG | R        | >50                               | 16.41  | >50   | >50   |
| 3016.v5.c45    | D        | R        | >50                               | 1.47   | 5.82  | 17.89 |
| Du172.17       | C        | R        | >50                               | 3.65   | >50   | >50   |
| 3718.v3.c11    | A        | P        | 19.61                             | 0.01   | 0.32  | 0.30  |
| 703357.C02     | CRF01_AE | P        | 19.17                             | 3.43   | 7.91  | 5.60  |
| CNE20          | BC       | P        | 7.83                              | 0.04   | 0.53  | 0.33  |
| CNE21          | BC       | P        | 6.01                              | 0.03   | 0.12  | 0.07  |
| HIV-16845-2.22 | C        | P        | 5.00                              | 0.45   | 0.59  | 0.59  |
| C2101.c01      | CRF01_AE | P        | 4.24                              | 0.04   | 0.11  | 0.09  |
| ZM247v1(Rev-)  | C        | P, T/F   | 2.94                              | 0.32   | 0.28  | 0.42  |
| ZM233M.PB6     | C        | P        | 2.50                              | 0.02   | 0.22  | 0.16  |
| C1080.c03      | CRF01_AE | P        | 2.48                              | 0.20   | 0.36  | 0.29  |
| THRO4156.18    | B        | P        | 1.91                              | 0.54   | 0.89  | 0.66  |
| 3103.v3.c10    | ACD      | P        | 1.770                             | 0.200  | 0.370 | 0.300 |
| 231966.c02     | D        | P        | 1.640                             | 0.020  | 0.060 | 0.060 |
| TRO.11         | B        | P        | 1.610                             | 0.040  | 0.110 | 0.080 |
| T251-18        | CRF02_AG | P        | 1.350                             | 0.260  | 0.410 | 0.350 |
| Ce1176_A3      | C        | S, T/F   | 0.930                             | 0.160  | 0.240 | 0.210 |
| QH0692.42      | B        | S        | 0.720                             | 0.370  | 0.560 | 0.520 |
| T255-34        | CRF02_AG | S        | 0.710                             | <0.001 | 0.030 | 0.040 |
| ZM135M.PL10a   | C        | S        | 0.590                             | 0.040  | 0.130 | 0.090 |
| AC10.0.29      | B        | S        | 0.560                             | 0.130  | 0.240 | 0.190 |
| T257-31        | CRF02_AG | S        | 0.490                             | 0.130  | 0.170 | 0.180 |
| CNE58          | BC       | S        | 0.430                             | 0.020  | 0.040 | 0.040 |
| Ce0393_C3      | C        | S, T/F   | 0.334                             | 0.013  | 0.040 | 0.036 |
| R1166.c01      | CRF01_AE | S        | 0.310                             | 0.130  | 0.400 | 0.240 |
| CNE30          | BC       | S        | 0.309                             | 0.052  | 0.100 | 0.099 |
| CNE17          | BC       | S        | 0.261                             | 0.036  | 0.075 | 0.073 |
| X2131_C1_B5    | G        | S        | 0.230                             | 0.050  | 0.100 | 0.100 |
| 928-28         | CRF02_AG | S        | 0.230                             | 0.060  | 0.110 | 0.120 |
| 6535.3         | B        | S        | 0.230                             | 0.030  | 0.070 | 0.080 |

| Virus             | Clade    | Category | WT    | G54W   | G54F   | G54Y   |
|-------------------|----------|----------|-------|--------|--------|--------|
| ZM53M.PB12        | C        | S        | 0.175 | 0.040  | 0.080  | 0.060  |
| ZM214M.PL15       | C        | S        | 0.170 | 0.030  | 0.090  | 0.060  |
| Ce703010054_2A2   | C        | S, T/F   | 0.159 | 0.027  | 0.020  | 0.022  |
| ZM197M.PB7        | C        | S        | 0.150 | 0.040  | 0.090  | 0.070  |
| CAAN5342.A2       | B        | S        | 0.150 | 0.070  | 0.100  | 0.100  |
| Q23.17            | A        | S        | 0.140 | 0.010  | 0.030  | 0.020  |
| PVO.4             | B        | S        | 0.120 | 0.050  | 0.070  | 0.060  |
| 1054_07_TC4_1499  | B        | S, T/F   | 0.113 | 0.040  | 0.076  | 0.064  |
| Ce2010_F5         | C        | S, T/F   | 0.101 | 0.038  | 0.046  | 0.049  |
| ZM109F.PB4        | C        | S        | 0.095 | 0.002  | 0.022  | 0.026  |
| 1056_10_TA11_1826 | B        | S, T/F   | 0.094 | 0.024  | 0.064  | 0.044  |
| 0330.v4.c3        | A        | S        | 0.090 | 0.030  | 0.040  | 0.030  |
| P1981_C5_3        | G        | S        | 0.080 | 0.020  | 0.030  | 0.040  |
| Q461.e2           | A        | S        | 0.076 | 0.009  | 0.030  | 0.023  |
| P0402_c2_11       | G        | S        | 0.073 | 0.003  | 0.008  | 0.012  |
| SC422661.8        | B        | S        | 0.060 | 0.020  | 0.040  | 0.040  |
| 62357_14_D3_4589  | B        | S, T/F   | 0.060 | 0.020  | 0.040  | 0.030  |
| WITO4160.33       | B        | S        | 0.060 | 0.010  | 0.020  | 0.030  |
| Ce2060_G9         | C        | S, T/F   | 0.058 | 0.005  | 0.022  | 0.021  |
| Ce0682_E4         | C        | S, T/F   | 0.054 | 0.010  | 0.011  | 0.017  |
| 231965.c01        | D        | S        | 0.051 | <0.001 | 0.022  | 0.025  |
| Q259.d2.17        | A        | S        | 0.043 | <0.001 | 0.009  | 0.009  |
| TRJO4551.58       | B        | S        | 0.040 | 0.010  | 0.030  | 0.030  |
| 6811.v7.c18       | CD       | S        | 0.035 | <0.001 | 0.017  | 0.011  |
| R2184.c04         | CRF01_AE | S        | 0.034 | 0.005  | 0.015  | 0.015  |
| 6480.v4.c25       | CD       | S        | 0.032 | 0.004  | 0.014  | 0.018  |
| X1254_c3          | G        | S        | 0.032 | 0.002  | 0.011  | 0.013  |
| Q842.d12          | A        | S        | 0.031 | 0.005  | 0.011  | 0.015  |
| C3347.c11         | CRF01_AE | S        | 0.029 | <0.001 | 0.015  | 0.011  |
| 1006_11_C3_1601   | B        | S, T/F   | 0.027 | <0.001 | 0.003  | 0.005  |
| 3415.v1.c1        | A        | S        | 0.022 | <0.001 | <0.001 | <0.001 |
| X1193_c1          | G        | S        | 0.021 | <0.001 | <0.001 | 0.006  |
| Du156.12          | C        | S        | 0.020 | <0.001 | <0.001 | 0.007  |
| RHPA4259.7        | B        | S        | 0.017 | <0.001 | 0.005  | 0.007  |
| ZM249M.PL1        | C        | S        | 0.017 | 0.002  | 0.004  | 0.003  |
| 0815.v3.c3        | ACD      | S        | 0.014 | <0.001 | <0.001 | <0.001 |
| REJO4541.67       | B        | S        | 0.014 | 0.002  | 0.007  | 0.007  |
| 3301.v1.c24       | AC       | S        | 0.009 | <0.001 | 0.001  | 0.003  |
| Q769.d22          | A        | S        | 0.009 | <0.001 | 0.005  | 0.007  |
| CNE53             | BC       | S        | 0.008 | <0.001 | 0.005  | 0.006  |
| WEAU_d15_410_787  | B        | S, T/F   | 0.005 | <0.001 | <0.001 | 0.002  |

**Geometric means**

**0.417**

**0.046**

**0.120**

**0.124**

Category

R - Resistant

S - Sensitive

P - Poorly sensitive

T/F - Transmitted Founder

|                                                 |       |          |         |        |       |     |
|-------------------------------------------------|-------|----------|---------|--------|-------|-----|
| IC <sub>50</sub> values (µg/mL)<br>color coding | <0.01 | 0.01-0.1 | 0.1-1.0 | 1.0-10 | 10-50 | >50 |
|-------------------------------------------------|-------|----------|---------|--------|-------|-----|

**Table S6**

***In vitro* neutralization IC<sub>80</sub> values (µg/mL)**

| Virus          | Clade    | Category | NIH45-46 IC <sub>80</sub> (µg/mL) |       |       |       |
|----------------|----------|----------|-----------------------------------|-------|-------|-------|
|                |          |          | WT                                | G54W  | G54F  | G54Y  |
| T250-4         | CRF02_AG | R        | >50                               | 44.94 | >50   | >50   |
| 703357.C02     | CRF01_AE | R        | >50                               | 17.61 | >50   | 30.58 |
| CAP45.2.00.G3  | C        | R        | >50                               | >50   | >50   | >50   |
| CNE20          | BC       | R        | >50                               | 0.48  | 3.91  | 2.40  |
| CAP210.2.00.E8 | C        | R        | >50                               | >50   | >50   | >50   |
| T278-50        | CRF02_AG | R        | >50                               | >50   | >50   | >50   |
| 211-9          | CRF02_AG | R        | >50                               | >50   | >50   | >50   |
| 620345.c01     | CRF01_AE | R        | >50                               | >50   | >50   | >50   |
| 3016.v5.c45    | D        | R        | >50                               | 15.37 | 36.97 | >50   |
| 3817.v2.c59    | CD       | R        | >50                               | >50   | >50   | >50   |
| 89-F1_2_25     | CD       | R        | >50                               | >50   | >50   | >50   |
| 6540.v4.c1     | AC       | R        | >50                               | >50   | >50   | >50   |
| 6545.v4.c1     | AC       | R        | >50                               | >50   | >50   | >50   |
| Du422.1        | C        | P        | >50                               | >50   | >50   | >50   |
| 3718.v3.c11    | A        | P        | >50                               | 0.04  | 4.620 | 3.85  |
| Du172.17       | C        | P        | >50                               | 42.85 | >50   | >50   |
| CNE21          | BC       | P        | 38.07                             | 0.16  | 0.66  | 0.29  |
| C2101.c01      | CRF01_AE | P        | 31.37                             | 0.17  | 0.42  | 0.27  |
| ZM247v1(Rev-)  | C        | P, T/F   | 24.50                             | 2.60  | 2.45  | 3.57  |
| HIV-16845-2.22 | C        | P        | 22.61                             | 2.10  | 2.75  | 2.75  |
| ZM233M.PB6     | C        | P        | 14.18                             | 0.11  | 0.99  | 0.78  |
| C1080.c03      | CRF01_AE | P        | 11.56                             | 0.91  | 2.26  | 1.83  |
| 231966.c02     | D        | P        | 9.64                              | 0.11  | 0.24  | 0.23  |
| THRO4156.18    | B        | P        | 8.22                              | 1.81  | 3.01  | 2.14  |
| TRO.11         | B        | P        | 7.49                              | 0.13  | 0.30  | 0.22  |
| 3103.v3.c10    | ACD      | P        | 6.15                              | 0.56  | 1.28  | 0.81  |
| T251-18        | CRF02_AG | P        | 3.68                              | 0.92  | 1.38  | 1.16  |
| T255-34        | CRF02_AG | S        | 3.442                             | 0.099 | 0.198 | 0.174 |
| Ce1176_A3      | C        | S, T/F   | 3.17                              | 0.45  | 0.83  | 0.58  |
| ZM135M.PL10a   | C        | S        | 2.79                              | 0.16  | 0.43  | 0.30  |
| CNE58          | BC       | S        | 2.08                              | 0.05  | 0.11  | 0.11  |
| AC10.0.29      | B        | S        | 1.93                              | 0.63  | 1.12  | 0.90  |
| QH0692.42      | B        | S        | 1.71                              | 1.12  | 1.65  | 1.50  |
| T257-31        | CRF02_AG | S        | 1.38                              | 0.45  | 0.51  | 0.67  |
| R1166.c01      | CRF01_AE | S        | 1.21                              | 0.51  | 1.32  | 0.84  |
| CNE30          | BC       | S        | 1.067                             | 0.196 | 0.348 | 0.263 |
| Ce0393_C3      | C        | S, T/F   | 0.936                             | 0.089 | 0.173 | 0.134 |
| X2131_C1_B5    | G        | S        | 0.88                              | 0.24  | 0.41  | 0.39  |
| CNE17          | BC       | S        | 0.734                             | 0.127 | 0.287 | 0.264 |
| 928-28         | CRF02_AG | S        | 0.64                              | 0.25  | 0.41  | 0.33  |

| Virus             | Clade    | Category | WT    | G54W  | G54F  | G54Y  |
|-------------------|----------|----------|-------|-------|-------|-------|
| ZM53M.PB12        | C        | S        | 0.61  | 0.16  | 0.23  | 0.22  |
| ZM214M.PL15       | C        | S        | 0.59  | 0.15  | 0.30  | 0.23  |
| ZM197M.PB7        | C        | S        | 0.55  | 0.18  | 0.23  | 0.21  |
| 6535.3            | B        | S        | 0.54  | 0.13  | 0.27  | 0.24  |
| Ce703010054_2A2   | C        | S, T/F   | 0.538 | 0.077 | 0.070 | 0.070 |
| Q23.17            | A        | S        | 0.50  | 0.03  | 0.07  | 0.06  |
| 1056_10_TA11_1826 | B        | S, T/F   | 0.447 | 0.160 | 0.283 | 0.189 |
| ZM109F.PB4        | C        | S        | 0.437 | 0.070 | 0.17  | 0.168 |
| PVO.4             | B        | S        | 0.41  | 0.16  | 0.25  | 0.18  |
| 1054_07_TC4_1499  | B        | S, T/F   | 0.404 | 0.165 | 0.283 | 0.236 |
| CAAN5342.A2       | B        | S        | 0.40  | 0.21  | 0.28  | 0.27  |
| Ce2010_F5         | C        | S, T/F   | 0.357 | 0.187 | 0.186 | 0.235 |
| 0330.v4.c3        | A        | S        | 0.3   | 0.11  | 0.13  | 0.09  |
| Q461.e2           | A        | S        | 0.291 | 0.091 | 0.135 | 0.103 |
| Ce2060_G9         | C        | S, T/F   | 0.290 | 0.042 | 0.085 | 0.068 |
| WITO4160.33       | B        | S        | 0.26  | 0.04  | 0.14  | 0.09  |
| P1981_C5_3        | G        | S        | 0.24  | 0.07  | 0.11  | 0.09  |
| P0402_c2_11       | G        | S        | 0.214 | 0.023 | 0.047 | 0.049 |
| 1006_11_C3_1601   | B        | S, T/F   | 0.196 | 0.008 | 0.024 | 0.021 |
| 62357_14_D3_4589  | B        | S, T/F   | 0.19  | 0.07  | 0.14  | 0.09  |
| Ce0682_E4         | C        | S, T/F   | 0.155 | 0.039 | 0.056 | 0.065 |
| Q259.d2.17        | A        | S        | 0.154 | 0.014 | 0.036 | 0.034 |
| SC422661.8        | B        | S        | 0.13  | 0.07  | 0.10  | 0.09  |
| TRJO4551.58       | B        | S        | 0.13  | 0.05  | 0.08  | 0.07  |
| R2184.c04         | CRF01_AE | S        | 0.127 | 0.036 | 0.054 | 0.045 |
| 231965.c01        | D        | S        | 0.126 | 0.035 | 0.062 | 0.054 |
| 6811.v7.c18       | CD       | S        | 0.113 | 0.033 | 0.063 | 0.059 |
| X1254_c3          | G        | S        | 0.107 | 0.018 | 0.043 | 0.041 |
| 6480.v4.c25       | CD       | S        | 0.100 | 0.021 | 0.046 | 0.051 |
| C3347.c11         | CRF01_AE | S        | 0.094 | 0.028 | 0.059 | 0.052 |
| 3415.v1.c1        | A        | S        | 0.086 | 0.023 | 0.029 | 0.037 |
| Q842.d12          | A        | S        | 0.073 | 0.025 | 0.039 | 0.045 |
| X1193_c1          | G        | S        | 0.064 | 0.009 | 0.026 | 0.024 |
| Du156.12          | C        | S        | 0.054 | 0.005 | 0.019 | 0.026 |
| ZM249M.PL1        | C        | S        | 0.053 | 0.007 | 0.016 | 0.011 |
| 0815.v3.c3        | ACD      | S        | 0.052 | 0.003 | 0.014 | 0.015 |
| RHPA4259.7        | B        | S        | 0.047 | 0.007 | 0.020 | 0.020 |
| CNE53             | BC       | S        | 0.039 | 0.005 | 0.024 | 0.027 |
| REJO4541.67       | B        | S        | 0.035 | 0.013 | 0.028 | 0.020 |
| 3301.v1.c24       | AC       | S        | 0.033 | 0.004 | 0.011 | 0.014 |
| Q769.d22          | A        | S        | 0.033 | 0.009 | 0.023 | 0.024 |
| WEAU_d15_410_787  | B        | S, T/F   | 0.015 | 0.003 | 0.004 | 0.008 |

**Geometric means**

**1.231**

**0.225**

**0.437**

**0.393**

Category

R - Resistant

S - Sensitive

P - Poorly sensitive

T/F - Transmitted Founder

|                                                 |       |          |         |        |       |     |
|-------------------------------------------------|-------|----------|---------|--------|-------|-----|
| IC <sub>80</sub> values (µg/mL)<br>color coding | <0.01 | 0.01-0.1 | 0.1-1.0 | 1.0-10 | 10-50 | >50 |
|-------------------------------------------------|-------|----------|---------|--------|-------|-----|

**Table S7****Sequence correlates of resistance to NIH45-46**

| Strain            | gp120 residue variations that may affect NIH45-46 neutralization |                  |                  |
|-------------------|------------------------------------------------------------------|------------------|------------------|
| <b>620345_c1</b>  | Ser456 (Arg)                                                     | Asp459 (Gly)     | Lys279 (Asn/Asp) |
| <b>89_F1_2_25</b> | Ser456 (Arg)                                                     | Asn458 (Gly)     |                  |
| <b>6540_v4_c1</b> | Ser456 (Arg)                                                     | Tyr458 (Gly)     | Ser280 (Asn)     |
| 6545_v4_c1        | Ser456 (Arg)                                                     | Tyr458 (Gly)     | Ser280 (Asn)     |
| <b>Du422.1</b>    | Trp456 (Arg)                                                     |                  |                  |
| T250_4            | Pro459 (Gly)                                                     |                  |                  |
| <b>T278_50</b>    | Glu459 (Gly)                                                     | Ala279 (Asn/Asp) |                  |
| Ce1172_H1         | deletion of Gly459                                               |                  |                  |
| X2088_c9          | Val459 (Gly)                                                     |                  |                  |
| H086.8            | Asp459 (Gly)                                                     | Lys279 (Asn/Asp) |                  |

**Table S7.** 10 of 17 NIH45-46-resistant strains (5 of 7 NIH45-46<sup>G54W</sup>-resistant strains, shown in bold) have amino acid variations at NIH45-46-contacting residues that have a fully conserved residue (shown in parenthesis) in all NIH45-46 sensitive strains. These mutations occur in the  $\beta$ 23 strand immediately preceding V5 and in loop D. The positions of shaded sites have been shown to be important in resistance to VRC01 (33).

For the remaining strains, resistance may relate to other features:

| Strain                | Possible NIH45-46 resistance correlate                                                                   |
|-----------------------|----------------------------------------------------------------------------------------------------------|
| Du172.17              | Lys462 (positive residue unusual at this position)                                                       |
| 3016.v5.c45           | Tyr282 (Lys) (likely a steric issue – change in loop D conformation); neutralized by VRC01               |
| CAP45.2.00.G3         | VRC01 light chain permits neutralization (Tyr28 <sub>VRC01 LC</sub> -glycan at Asn276 <sub>gp120</sub> ) |
| <b>3817.v2.c59</b>    | Quaternary effect suggested in ref. (33)                                                                 |
| <b>CAP210.2.00.E8</b> | Mechanism unclear                                                                                        |
| 246F C1G              |                                                                                                          |
| 211-9                 |                                                                                                          |

The largest difference between sensitivity to NIH45-46 and sensitivity to VRC01 was in strain 3016.v5.c45 (IC<sub>50s</sub> of >30 and 0.16  $\mu$ g/mL, respectively). The most notable residue in 3016.v5.c45 is Tyr282 in loop D. This large residue may alter the conformation of loop D, which is closely contacted by the four-residue insertion in the NIH45-46 CDRH3. The absence of the insertion may permit VRC01 to better accommodate an altered loop D. The next largest NIH45-46/VRC01 difference, for strain C2101.c1 (12.78 vs. 0.36  $\mu$ g/mL), may similarly relate to the unusual Lys99<sub>gp120</sub> residue replacing the asparagine that favorably interacts with Arg99b<sub>NIH45-46</sub> in the NIH45-46–gp120 crystal structure.

**Table S8****Effects of position 54 substitution in selected bNAbs*****In vitro* neutralization IC<sub>50</sub> values (µg/mL)**

| Virus          | Clade | 3BNC60<br>WT | 3BNC60<br>T54W | 3BNC117<br>WT | 3BNC117<br>T54W | 3BNC55<br>WT | 3BNC55<br>T54W | 12A12<br>WT | 12A12<br>Y54W |
|----------------|-------|--------------|----------------|---------------|-----------------|--------------|----------------|-------------|---------------|
| SC422661.8     | B     | 0.1          | 0.1            | 0.07          | 0.07            | 0.3          | 0.6            | 0.2         | 0.2           |
| AC10.0.29      | B     | 13           | 3.1            | 6.5           | 2.8             | >50          | >50            | 0.6         | 0.5           |
| TRO.11         | B     | 0.07         | 0.06           | 0.6           | 0.6             | 7.6          | >50            | 0.3         | 0.2           |
| Du172.17       | C     | 0.05         | 0.04           | 0.04          | 0.9             | 2            | >50            | 0.2         | 0.1           |
| CAP210.2.00.E8 | C     | 4.7          | 5.0            | 11            | 2.8             | >50          | >50            | >50         | >50           |
| CAP45.2.00.G3  | C     | 10           | 19             | 16            | 23              | >50          | >50            | 0.4         | 0.2           |

Color-coded according to IC<sub>50</sub> values (µg/mL): red <0.1, orange 0.1-1, yellow 1-10, green 10-50, white > 50 (not neutralizing).



**Table S9**

**Potencies of currently-available bNABs**

IC<sub>50</sub>

| Isolate             |                 | PGT-121 | PGT-122 | PGT-123 | PGT-125 | PGT-126 | PGT-127 | PGT-128 | PGT-130 | PGT-131 | PGT-135 | PGT-136 | PGT-137 | PGT-141 | PGT-142 | PGT-143 | PGT-144 | PGT-145 | VRC01 | VRC-PG04 | PG9   |
|---------------------|-----------------|---------|---------|---------|---------|---------|---------|---------|---------|---------|---------|---------|---------|---------|---------|---------|---------|---------|-------|----------|-------|
| Include >50 (µg/mL) | Geometric mean  | 0.53    | 1.03    | 0.66    | 1.85    | 1.05    | 2.92    | 0.39    | 3.07    | 7.27    | 9.53    | 30.39   | 23.53   | 3.15    | 2.40    | 3.14    | 13.62   | 0.91    | 0.45  | 0.57     | 1.27  |
|                     | Arithmetic mean | 16.63   | 19.39   | 18.29   | 25.81   | 21.75   | 26.19   | 15.31   | 25.39   | 31.06   | 34.91   | 44.02   | 41.22   | 24.62   | 23.30   | 24.62   | 33.76   | 12.83   | 4.41  | 7.92     | 15.89 |
|                     | Median          | 0.31    | 2.02    | 0.35    | 34.97   | 1.08    | 42.83   | 0.10    | 22.98   | 50.00   | 50.00   | 50.00   | 50.00   | 16.01   | 9.46    | 13.76   | 50.00   | 0.86    | 0.34  | 0.30     | 0.62  |

|                     |                       |      |      |      |      |      |      |      |      |      |      |       |       |      |      |      |      |      |      |      |      |
|---------------------|-----------------------|------|------|------|------|------|------|------|------|------|------|-------|-------|------|------|------|------|------|------|------|------|
| Exclude >50 (µg/mL) | Geometric mean        | 0.07 | 0.13 | 0.08 | 0.09 | 0.08 | 0.17 | 0.06 | 0.24 | 0.41 | 0.32 | 2.25  | 1.68  | 0.33 | 0.24 | 0.34 | 1.58 | 0.30 | 0.32 | 0.30 | 0.36 |
|                     | Arithmetic mean       | 2.17 | 3.21 | 2.44 | 3.34 | 2.82 | 2.39 | 1.56 | 3.09 | 2.80 | 3.88 | 12.74 | 10.51 | 3.80 | 2.99 | 4.32 | 6.87 | 2.59 | 1.04 | 1.99 | 4.33 |
|                     | Median                | 0.03 | 0.05 | 0.03 | 0.04 | 0.04 | 0.08 | 0.02 | 0.16 | 0.52 | 0.17 | 7.81  | 3.46  | 0.35 | 0.21 | 0.31 | 2.06 | 0.29 | 0.32 | 0.20 | 0.23 |
|                     | % viruses <50 (µg/mL) | 70%  | 65%  | 67%  | 52%  | 60%  | 50%  | 72%  | 52%  | 40%  | 33%  | 16%   | 22%   | 55%  | 57%  | 56%  | 38%  | 78%  | 92%  | 88%  | 75%  |

**Table S9.** Potencies of currently-available bNABs. **(A)** Comparison of mean and median IC<sub>50</sub> (µg/mL) values for PGT antibodies and VRC01. A direct comparison between NIH45-46 and the PGT antibodies is not available. However VRC01 (which was shown in a direct comparison to be less potent than NIH45-46 (16)) was directly compared to the PGT antibodies using the same virus panel (18) and thus can serve as a reference for comparing NIH45-46 to the PGT antibodies. Mean IC<sub>50</sub> values were calculated using data taken from ref. (18). Geometric and arithmetic means were calculated to include data for all viral strains (listed as Include >50, in which case, values reported as IC<sub>50</sub> >50 µg/mL were entered as 50 µg/mL in the calculation) and to exclude viral strains in which the IC<sub>50</sub> was >50 µg/mL (listed as Exclude >50, in which case the percent of viral strains with IC<sub>50</sub>s < 50 µg/mL is also reported). Mean IC<sub>50</sub>s are compared with the median IC<sub>50</sub>s as reported in ref. (18). The table is color-coded according to IC<sub>50</sub> values (µg/mL): red <0.1, orange 0.1-1, yellow 1-10, green 10-50, white >50 (not neutralizing) or the percent of viral strains neutralized: red >90, orange 80-90, yellow 70-80, green 50-70, white <50.

## References and Notes

1. A. S. Fauci *et al.*, *Science* **321**, 530 (Jul 25, 2008).
2. M. J. McElrath, B. F. Haynes, *Immunity* **33**, 542 (Oct 29, 2010).
3. G. B. Karlsson Hedestam *et al.*, *Nat Rev Microbiol* **6**, 143 (Feb, 2008).
4. A. J. McMichael, P. Borrow, G. D. Tomaras, N. Goonetilleke, B. F. Haynes, *Nat Rev Immunol* **10**, 11 (Jan, 2010).
5. S. Zolla Pazner, T. Cardozo, *Nature reviews. Immunology* **10**, 527 (2010).
6. L. M. Walker *et al.*, *Science* **326**, 285 (Sep 3, 2009).
7. J. F. Scheid *et al.*, *Nature* **458**, 636 (Apr 2, 2009).
8. X. Wu *et al.*, *Science* **329**, 856 (Aug 13, 2010).
9. L. Stamatatos, L. Morris, D. R. Burton, J. R. Mascola, *Nat Med* **15**, 866 (Aug, 2009).
10. E. S. Gray *et al.*, *J Virol* **85**, 4828 (May, 2011).
11. I. Mikell *et al.*, *PLoS Pathog* **7**, e1001251 (2011).
12. A. Trkola *et al.*, *Nat Med* **11**, 615 (Jun, 2005).
13. J. R. Mascola *et al.*, *Nat Med* **6**, 207 (Feb, 2000).
14. A. J. Hessel *et al.*, *PLoS Pathog* **5**, e1000433 (May, 2009).
15. A. J. Hessel *et al.*, *Nature* **449**, 101 (Sep 6, 2007).
16. J. F. Scheid *et al.*, *Science* **333**, 1633 (Aug 11, 2011).
17. J. F. Scheid *et al.*, *J Immunol Methods* **343**, 65 (Apr 15, 2009).
18. L. M. Walker *et al.*, *Nature* **477**, 466 (Aug 17, 2011).
19. D. Corti *et al.*, *PLoS One* **5**, e8805 (2010).
20. M. Bonsignori *et al.*, *J Virol*, (Jul 27, 2011).
21. Q. J. Sattentau, R. A. Weiss, *Cell* **52**, 631 (Mar 11, 1988).
22. M. Thali *et al.*, *J Virol* **67**, 3978 (Jul, 1993).
23. B. Chen *et al.*, *Nature* **433**, 834 (Feb 24, 2005).
24. J. M. Decker *et al.*, *J Exp Med* **201**, 1407 (May 2, 2005).
25. T. Zhou *et al.*, *Science* **329**, 811 (Aug 13, 2010).
26. X. Wu *et al.*, *Science* **333**, 1593 (Aug 11, 2011).
27. Materials and methods are available as supporting material on Science Online.
28. G. Nabel, P. Kwong, J. Mascola, *Philosophical transactions - Royal Society. Biological sciences* **366**, 2759 (2011).
29. P. D. Kwong *et al.*, *Nature* **393**, 648 (Jun 18, 1998).
30. N. Madani *et al.*, *Structure* **16**, 1689 (Nov 12, 2008).
31. Taken from a crystal structure of Fab 21c plus CD4 domains 1 and 2 bound to the ZM135M.PL10a gp120 core at 2.45Å (to be submitted to the PDB).
32. Geometric mean IC<sub>50</sub> calculations were done without excluding resistant strains by entering values of 50 µg/mL for strains with IC<sub>50</sub> values >50 µg/mL.
33. Y. Li *et al.*, *J Virol* **85**, 8954 (Sep, 2011).
34. R. Diskin, P. M. Marcovecchio, P. J. Bjorkman, *Nat Struct Mol Biol* **17**, 608 (May, 2010).
35. W. Kabsch, *Acta Crystallogr D Biol Crystallogr* **66**, 125 (Feb, 2010).
36. A. J. McCoy *et al.*, *J. Appl. Cryst.* **40**, 658 (2007).
37. P. D. Adams *et al.*, *Acta Crystallogr D Biol Crystallogr* **66**, 213 (Feb, 2010).
38. P. Emsley, K. Cowtan, *Acta Crystallogr D Biol Crystallogr* **60**, 2126 (Dec, 2004).
39. Collaborative Computational Project Number 4, *Acta Crystallographica Section D-Biological Crystallography* **50**, 760 (1994).

40. L. Schrödinger. (The PyMOL Molecular Graphics System, 2011).
41. D. C. Montefiori, *Current protocols in immunology / edited by John E. Coligan ... [et al Chapter 12*, Unit 12 11 (Jan, 2005).
42. J. S. Klein *et al.*, *Proc Natl Acad Sci USA* **106**, 7385 (May 5, 2009).
43. M. P. Lefranc *et al.*, *Nucleic Acids Res* **37**, D1006 (Jan, 2009).
44. CCP4, *Acta Crystallogr.* **D50**, 760 (1994).
